# Supplementary material for: Vitamin D Enhances Radiosensitivity of Colorectal Cancer by Reversing Epithelial-Mesenchymal Transition
Source: Frontiers journal article supplement (doi:10.3389/fcell.2021.684855), 2021-08-04
Supplement: Data_Sheet_1.PDF [file Data_Sheet_1.PDF]

## Supplementary Fig. 1.

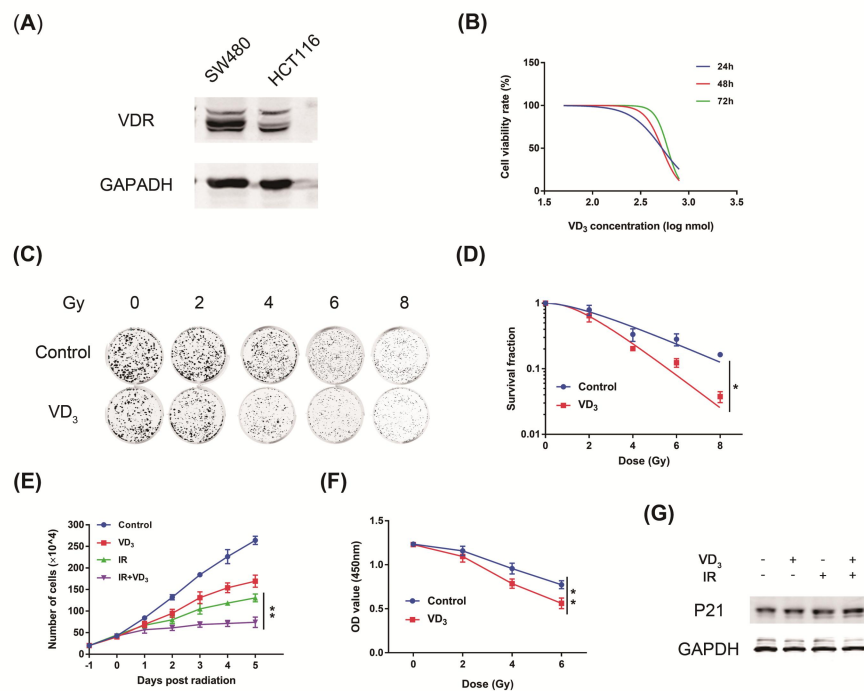

## VD<sub>3</sub> enhanced radiosensitivity of HCT116 in vitro

**A**, VDR was evident in SW480 and HCT116 cell lines. **B**, IC<sub>50</sub> of VD<sub>3</sub> on SW480 cells determined by CCK8. **C and D**, Clonogenic assays were used to determine the radiosensitization effects of VD<sub>3</sub> on HCT116 cells. **E**, Cell proliferation inhibition of VD<sub>3</sub> was evaluated in HCT116 cells. **F**, Trypan blue assay detected cell viability in treated HCT116 cells. **G**, p21 (Cell cycle protein) determined by western blot. \* $p < 0.05$ , \*\* $p < 0.01$ , \*\*\* $p < 0.001$ , \*\*\*\* $p < 0.0001$ .

## Supplementary Fig. 2.

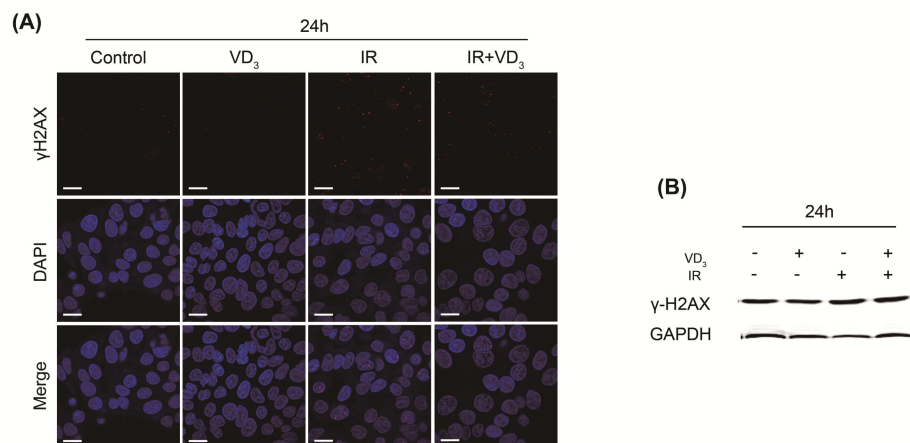

### VD<sub>3</sub> combined with IR participated in DNA damage

**A**,  $\gamma$ -H2AX foci formation for 24 h post IR in SW480 cells. Scale bar: 20  $\mu$ m. **B**,  $\gamma$ -H2AX expression for 24 h post IR was detected by western blot.

### Supplementary Fig. 3.

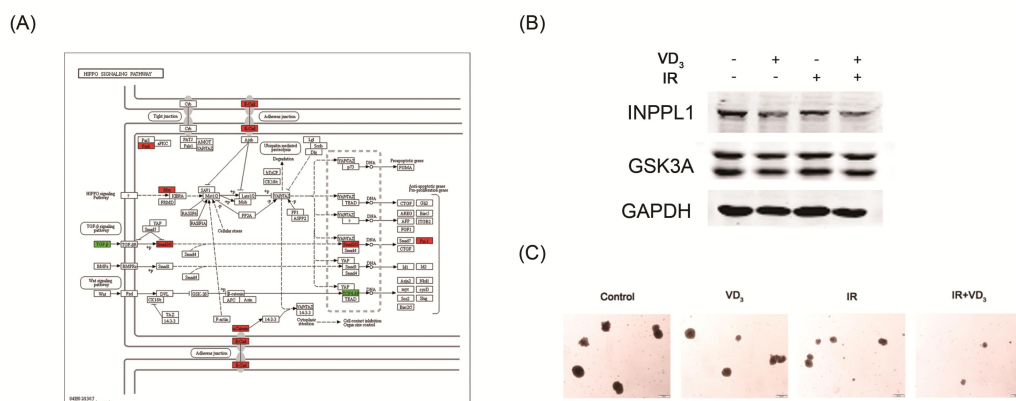

### Proteomics revealed influence on EMT

**A**, KEGG pathway analysis of differentially expressed proteins enriched in

TGF-  $\beta$  /Smad3 signaling. **B**, Immunoblot analysis of the downregulated proteins determined in proteomics. **C**, Sphere formation of colorectal cancer stem cells with combined treatment. Scale bar: 200 $\mu$ m.
